# Supplementary material
Source: publisher site journal article supplement (https://www.dovepress.com/article/377502)
Supplement: Supplementary file 1 [file get_supplementary_file.php]

**Supporting information**

# Enhancing Cutaneous Wound Healing Based on Human Induced Neural Stem Cells-Derived Exosomes

Jing Li1, *, Hong Gao1, *, Yue Xiong1, *, Ling Wang1, Haojie Zhang1, Fumei He1, Jingxin Zhao1, Shuna Liu1, Liqian Gao1, Ying Guo1, and Wenbin Deng1

1School of pharmaceutical sciences (Shenzhen), Shenzhen Campus of Sun Yat-sen University, Shenzhen, People’s Republic of China;

*These authors contribute equally to this work

Correspondence:

Ying Guo and Wenbin Deng, Email guoying1226@hotmail.com and dengwb5@mail.sysu.edu.cn

**Contents**

**1. Table S1.** The top 100 relative abundant proteins in NSC-exo………….……….S-3

**2. Figure S1**. The quantitative analysis of immunofluorescence of Gap43 in skin sections…………………………………………………………………………………………S-7

**Table S1.** The top 100 relative abundant proteins in NSC-exo

| **Protein FDR Confidence** | **Accession** | **Description** |
| --- | --- | --- |
| High | P08134 | Rho-related GTP-binding protein RhoC [OS=Homo sapiens] |
| High | P01834 | immunoglobulin kappa constant [OS=Homo sapiens] |
| High | O75051-1 | Plexin-A2 [OS=Homo sapiens] |
| High | Q96PD5-2 | Isoform 2 of N-acetylmuramoyl-L-alanine amidase [OS=Homo sapiens] |
| High | Q14117 | dihydropyrimidinase [OS=Homo sapiens] |
| High | P01008 | Antithrombin-III [OS=Homo sapiens] |
| High | P0DOX8 | Immunoglobulin lambda-1 light chain [OS=Homo sapiens] |
| High | Q8IYR6-1 | Tomoregulin-1 [OS=Homo sapiens] |
| High | A6NCS6 | Uncharacterized protein C2orf72 [OS=Homo sapiens] |
| High | Q9BSA4-1 | Protein tweety homolog 2 [OS=Homo sapiens] |
| High | P02649 | Apolipoprotein E [OS=Homo sapiens] |
| High | P02792 | Ferritin light chain [OS=Homo sapiens] |
| High | P55058 | phospholipid transfer protein [OS=Homo sapiens] |
| High | Q06278 | aldehyde oxidase [OS=Homo sapiens] |
| High | Q93088 | Betaine--homocysteine S-methyltransferase 1 [OS=Homo sapiens] |
| High | Q02413 | Desmoglein-1 [OS=Homo sapiens] |
| High | P35542 | Serum amyloid A-4 protein [OS=Homo sapiens] |
| Medium | Q9H2G4 | testis-specific Y-encoded-like protein 2 [OS=Homo sapiens] |
| High | P29400-2 | Isoform 2 of Collagen alpha-5(IV) chain [OS=Homo sapiens] |
| High | O75891-3 | Isoform 3 of Cytosolic 10-formyltetrahydrofolate dehydrogenase [OS=Homo sapiens] |
| High | P52799 | Ephrin-B2 [OS=Homo sapiens] |
| High | Q7Z3E5 | LisH domain-containing protein ARMC9 [OS=Homo sapiens] |
| High | O15230 | Laminin subunit alpha-5 [OS=Homo sapiens] |
| Medium | P41732 | Tetraspanin-7 [OS=Homo sapiens] |
| High | Q8TB73 | Protein NDNF [OS=Homo sapiens] |
| High | P43007-1 | neutral amino acid transporter A [OS=Homo sapiens] |
| Medium | P02743 | Serum amyloid P-component [OS=Homo sapiens] |
| High | Q9Y663 | Heparan sulfate glucosamine 3-O-sulfotransferase 3A1 [OS=Homo sapiens] |
| High | P31641 | Sodium- and chloride-dependent taurine transporter [OS=Homo sapiens] |
| High | P04424 | argininosuccinate lyase [OS=Homo sapiens] |
| High | P08572 | Collagen alpha-2(IV) chain [OS=Homo sapiens] |
| High | P13497 | Bone morphogenetic protein 1 [OS=Homo sapiens] |
| Medium | Q12882-1 | Dihydropyrimidine dehydrogenase [NADP(+)] [OS=Homo sapiens] |
| High | Q15043 | Zinc transporter ZIP14 [OS=Homo sapiens] |
| High | Q14699 | raftlin [OS=Homo sapiens] |
| High | P00480 | Ornithine carbamoyltransferase, mitochondrial [OS=Homo sapiens] |
| High | Q9BYE4 | Small proline-rich protein 2G [OS=Homo sapiens] |
| High | A0A0C4DH55 | immunoglobulin kappa variable 3D-7 [OS=Homo sapiens] |
| Medium | Q96S97 | myeloid-associated differentiation marker [OS=Homo sapiens] |
| Medium | Q8ND61-1 | Uncharacterized protein C3orf20 [OS=Homo sapiens] |
| High | P21453 | Sphingosine 1-phosphate receptor 1 [OS=Homo sapiens] |
| Medium | Q03181 | Peroxisome proliferator-activated receptor delta [OS=Homo sapiens] |
| High | O15126-1 | Secretory carrier-associated membrane protein 1 [OS=Homo sapiens] |
| Medium | P08582-1 | Melanotransferrin [OS=Homo sapiens] |
| Medium | P42338 | Phosphatidylinositol 4,5-bisphosphate 3-kinase catalytic subunit beta isoform [OS=Homo sapiens] |
| Medium | Q9BU40-4 | Isoform 4 of Chordin-like protein 1 [OS=Homo sapiens] |
| High | Q14624-1 | Inter-alpha-trypsin inhibitor heavy chain H4 [OS=Homo sapiens] |
| High | P0DOX5 | immunoglobulin gamma-1 heavy chain [OS=Homo sapiens] |
| High | P0DOY2 | immunoglobulin lambda constant 2 [OS=Homo sapiens] |
| High | P17302 | Gap junction alpha-1 protein [OS=Homo sapiens] |
| High | P02790 | Hemopexin [OS=Homo sapiens] |
| High | P05156 | Complement factor I [OS=Homo sapiens] |
| High | P02787 | Serotransferrin [OS=Homo sapiens] |
| High | P11047 | Laminin subunit gamma-1 [OS=Homo sapiens] |
| High | P06681-1 | complement C2 [OS=Homo sapiens] |
| High | P02751-15 | Isoform 15 of Fibronectin [OS=Homo sapiens] |
| High | A6NE02 | BTB/POZ domain-containing protein 17 [OS=Homo sapiens] |
| High | P14543-1 | Nidogen-1 [OS=Homo sapiens] |
| High | P01861 | Immunoglobulin heavy constant gamma 4 [OS=Homo sapiens] |
| High | P05186-1 | Alkaline phosphatase, tissue-nonspecific isozyme [OS=Homo sapiens] |
| High | P25391 | Laminin subunit alpha-1 [OS=Homo sapiens] |
| High | P0DOX7 | immunoglobulin kappa light chain [OS=Homo sapiens] |
| High | P68871 | Hemoglobin subunit beta [OS=Homo sapiens] |
| High | P02768-1 | Serum albumin [OS=Homo sapiens] |
| High | Q9NTX5 | Ethylmalonyl-CoA decarboxylase [OS=Homo sapiens] |
| High | P07942 | Laminin subunit beta-1 [OS=Homo sapiens] |
| High | P01876 | immunoglobulin heavy constant alpha 1 [OS=Homo sapiens] |
| High | P21926 | CD9 antigen [OS=Homo sapiens] |
| High | P10909-2 | Isoform 2 of Clusterin [OS=Homo sapiens] |
| High | Q96SJ8 | Tetraspanin-18 [OS=Homo sapiens] |
| High | Q9H313-3 | Isoform 3 of Protein tweety homolog 1 [OS=Homo sapiens] |
| High | Q8NG11-1 | Tetraspanin-14 [OS=Homo sapiens] |
| High | P69905 | Hemoglobin subunit alpha [OS=Homo sapiens] |
| High | O43657 | Tetraspanin-6 [OS=Homo sapiens] |
| High | P34741 | syndecan-2 [OS=Homo sapiens] |
| High | O14672 | Disintegrin and metalloproteinase domain-containing protein 10 [OS=Homo sapiens] |
| High | O43854-1 | EGF-like repeat and discoidin I-like domain-containing protein 3 [OS=Homo sapiens] |
| High | P07355-2 | Isoform 2 of Annexin A2 [OS=Homo sapiens] |
| High | P00738 | Haptoglobin [OS=Homo sapiens] |
| High | Q9H4F8-2 | Isoform 2 of SPARC-related modular calcium-binding protein 1 [OS=Homo sapiens] |
| High | O00468-3 | Isoform 3 of Agrin [OS=Homo sapiens] |
| High | P06737-1 | Glycogen phosphorylase, liver form [OS=Homo sapiens] |
| High | O15294 | UDP-N-acetylglucosamine--peptide N-acetylglucosaminyltransferase 110 kDa subunit [OS=Homo sapiens] |
| Medium | Q9Y6C2 | EMILIN-1 [OS=Homo sapiens] |
| High | Q08431 | Lactadherin [OS=Homo sapiens] |
| High | O14817 | Tetraspanin-4 [OS=Homo sapiens] |
| High | P98160 | Basement membrane-specific heparan sulfate proteoglycan core protein [OS=Homo sapiens] |
| High | O00560-1 | Syntenin-1 [OS=Homo sapiens] |
| High | Q9P2B2 | prostaglandin F2 receptor negative regulator [OS=Homo sapiens] |
| High | P04040 | catalase [OS=Homo sapiens] |
| High | Q969P0 | Immunoglobulin superfamily member 8 [OS=Homo sapiens] |
| High | P60201-1 | Myelin proteolipid protein [OS=Homo sapiens] |
| High | P27701 | CD82 antigen [OS=Homo sapiens] |
| High | Q9NQ36-1 | Signal peptide, CUB and EGF-like domain-containing protein 2 [OS=Homo sapiens] |
| High | P00751-1 | Complement factor B [OS=Homo sapiens] |
| High | P00352 | Retinal dehydrogenase 1 [OS=Homo sapiens] |
| High | P60033 | CD81 antigen [OS=Homo sapiens] |
| High | Q96T51 | RUN and FYVE domain-containing protein 1 [OS=Homo sapiens] |
| High | Q8N474 | Secreted frizzled-related protein 1 [OS=Homo sapiens] |
| High | Q9H223 | EH domain-containing protein 4 [OS=Homo sapiens] |

**Figure S1**. The quantitative analysis of immunofluorescence of Gap43 in skin sections.
